# Supplementary material
Source: Springer Nature journal article supplement (https://www.springermedizin.de/resource/supplementary/12943_2012_1047_MOESM9_ESM.pdf/9552194)

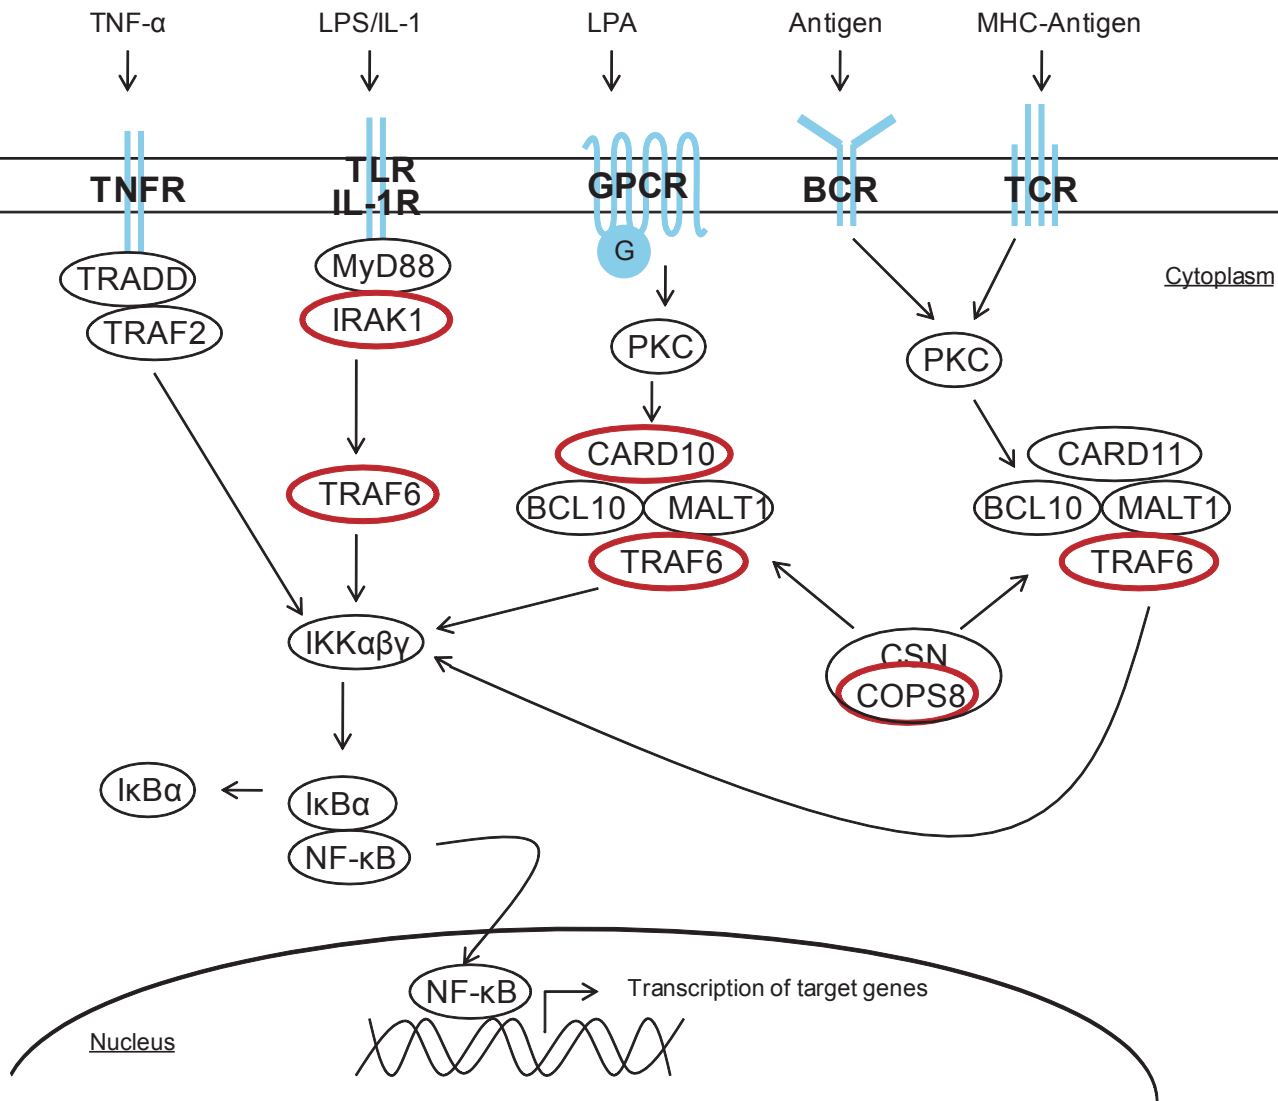

Supplement: MOESM9 [file 9552194]
